# Supplementary material
Source: Springer Nature journal article supplement (https://www.springermedizin.de/resource/supplementary/40478_2013_59_MOESM21_ESM.pdf/25658004)
Supplement: MOESM21 [file 25658004]

Table 2. CIS gene expression according to clinicogenetic groups and presence of metastatic disease.

|                |             | Clinicogenetic Groups |             |       |       | Metastatic Disease |    |              |    |                |    |                |    |             |              |                  |              |    |       |
|----------------|-------------|-----------------------|-------------|-------|-------|--------------------|----|--------------|----|----------------|----|----------------|----|-------------|--------------|------------------|--------------|----|-------|
|                |             | SHH v Other Subgroups |             |       |       | WNT(N=15)          |    | SHH (N=24)   |    | Group 3 (N=24) |    | Group 4 (N=48) |    | Mets (N=32) |              | No Mets (N = 75) |              |    |       |
|                |             | Mean SHH              | Mean Others | t     | p-val | Mean               | SE | Mean         | SE | Mean           | SE | Mean           | SE | p-val       | Mean         | SE               | Mean         | SE | p-val |
| <i>NFIA</i>    | 224975_at   | 11.25                 | 10.80       | -1.31 |       | 11.41 ± 0.18       |    | 11.25 ± 0.30 |    | 9.44 ± 0.42    |    | 11.32 ± 0.16   |    | **          | 10.78 ± 0.32 |                  | 11.03 ± 0.15 |    |       |
| <i>ATXN2</i>   | 202622_s_at | 7.41                  | 7.60        | 2.00  |       | 7.50 ± 0.11        |    | 7.41 ± 0.08  |    | 7.36 ± 0.11    |    | 7.75 ± 0.06    |    | **          | 7.68 ± 0.08  |                  | 7.47 ± 0.05  |    | *     |
| <i>TEAD1</i>   | 224955_at   | 10.80                 | 9.85        | -6.34 | ***   | 11.10 ± 0.12       |    | 10.80 ± 0.12 |    | 10.13 ± 0.15   |    | 9.33 ± 0.07    |    | **          | 9.68 ± 0.13  |                  | 10.11 ± 0.11 |    | *     |
| <i>TGIF2</i>   | 216262_s_at | 7.61                  | 5.02        | -8.98 | ***   | 7.75 ± 0.10        |    | 7.61 ± 0.23  |    | 5.48 ± 0.28    |    | 3.97 ± 0.10    |    | **          | 4.46 ± 0.22  |                  | 5.88 ± 0.22  |    | ***   |
| <i>CREBBP</i>  | 202160_at   | 9.93                  | 9.80        | -0.85 |       | 9.95 ± 0.10        |    | 9.93 ± 0.10  |    | 9.13 ± 0.32    |    | 10.09 ± 0.07   |    | **          | 9.73 ± 0.13  |                  | 9.82 ± 0.12  |    |       |
| <i>DSCR3</i>   | 203635_at   | 7.08                  | 6.78        | -3.19 | **    | 6.84 ± 0.18        |    | 7.08 ± 0.08  |    | 6.69 ± 0.09    |    | 6.80 ± 0.06    |    |             | 6.82 ± 0.08  |                  | 6.82 ± 0.06  |    |       |
| <i>PTEN</i>    | 225363_at   | 10.31                 | 11.12       | 4.63  | ***   | 11.16 ± 0.20       |    | 10.31 ± 0.15 |    | 10.12 ± 0.15   |    | 11.62 ± 0.06   |    | **          | 11.03 ± 0.14 |                  | 10.94 ± 0.10 |    |       |
| <i>ITGBL1</i>  | 214927_at   | 6.49                  | 3.90        | -4.47 | ***   | 4.27 ± 0.56        |    | 6.49 ± 0.55  |    | 3.16 ± 0.25    |    | 4.16 ± 0.25    |    | **          | 3.91 ± 0.33  |                  | 4.85 ± 0.27  |    | *     |
| <i>NFIB</i>    | 209290_s_at | 12.92                 | 12.67       | -0.66 |       | 10.46 ± 0.48       |    | 12.92 ± 0.32 |    | 12.18 ± 0.38   |    | 13.58 ± 0.09   |    | **          | 12.81 ± 0.28 |                  | 12.85 ± 0.16 |    |       |
| <i>MYT1L</i>   | 210016_at   | 8.27                  | 10.24       | 2.80  | **    | 6.06 ± 0.70        |    | 8.27 ± 0.64  |    | 9.20 ± 0.43    |    | 12.02 ± 0.11   |    | **          | 11.28 ± 0.22 |                  | 9.41 ± 0.36  |    | **    |
| <i>ANKRD5</i>  | 220144_s_at | 4.63                  | 4.75        | 0.54  |       | 4.51 ± 0.28        |    | 4.63 ± 0.19  |    | 5.46 ± 0.21    |    | 4.46 ± 0.10    |    | **          | 4.65 ± 0.16  |                  | 4.77 ± 0.11  |    |       |
| <i>SLIT3</i>   | 203813_s_at | 3.01                  | 2.98        | -0.17 |       | 2.90 ± 0.09        |    | 3.01 ± 0.14  |    | 2.82 ± 0.05    |    | 3.09 ± 0.10    |    |             | 2.98 ± 0.10  |                  | 2.94 ± 0.06  |    |       |
| <i>TMEM45B</i> | 226226_at   | 2.37                  | 2.44        | 1.57  |       | 2.34 ± 0.04        |    | 2.37 ± 0.04  |    | 2.52 ± 0.04    |    | 2.44 ± 0.03    |    | *           | 2.45 ± 0.03  |                  | 2.44 ± 0.02  |    |       |
| <i>SFI1</i>    | 36545_s_at  | 5.96                  | 5.19        | -2.68 | *     | 5.74 ± 0.24        |    | 5.96 ± 0.25  |    | 4.42 ± 0.23    |    | 5.42 ± 0.19    |    | **          | 5.24 ± 0.20  |                  | 5.36 ± 0.16  |    |       |
| <i>FGF13</i>   | 205110_s_at | 5.88                  | 8.10        | 3.66  | ***   | 5.33 ± 0.86        |    | 5.88 ± 0.54  |    | 6.81 ± 0.49    |    | 9.58 ± 0.16    |    | **          | 8.73 ± 0.39  |                  | 7.01 ± 0.32  |    | **    |
| <i>L3MBTL4</i> | 228557_at   | 6.85                  | 3.73        | -7.43 | ***   | 4.28 ± 0.28        |    | 6.85 ± 0.40  |    | 4.82 ± 0.22    |    | 3.01 ± 0.10    |    | **          | 3.76 ± 0.21  |                  | 4.59 ± 0.24  |    | *     |
| <i>ADCY5</i>   | 228182_at   | 3.50                  | 3.70        | 0.66  |       | 3.52 ± 0.27        |    | 3.50 ± 0.27  |    | 2.73 ± 0.16    |    | 4.25 ± 0.21    |    | **          | 3.65 ± 0.22  |                  | 3.60 ± 0.16  |    |       |

\*p<0.05 \*\*p<0.01 \*\*\*p<0.001
